# Supplementary material for: Effect of cisplatin cycles on prognosis for cervical cancer patients treated with concurrent chemoradiotherapy: a long-term cohort study
Source: Research Square preprint supplement (doi:10.21203/rs.3.rs-6380890/v1), 2025-05-09
Supplement: Supplementary file 1 [file e3b3795afcb64b9cccb51552.docx]

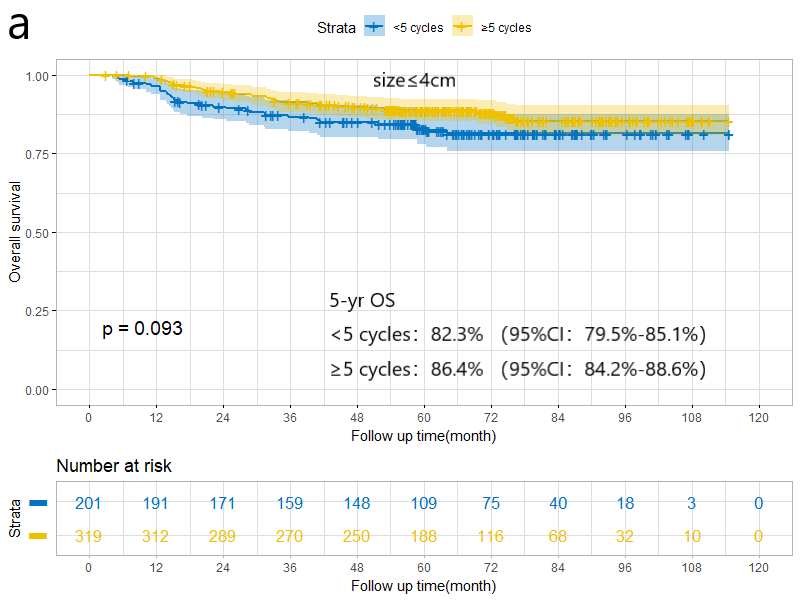

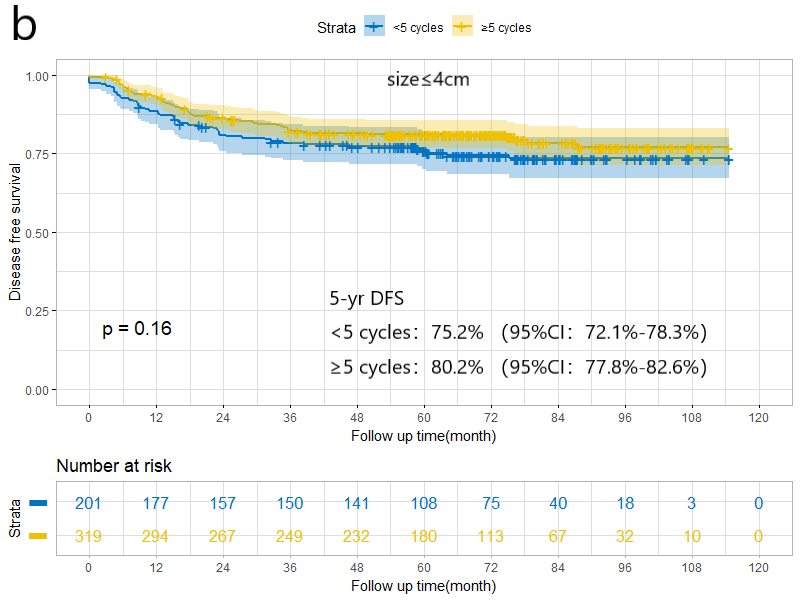


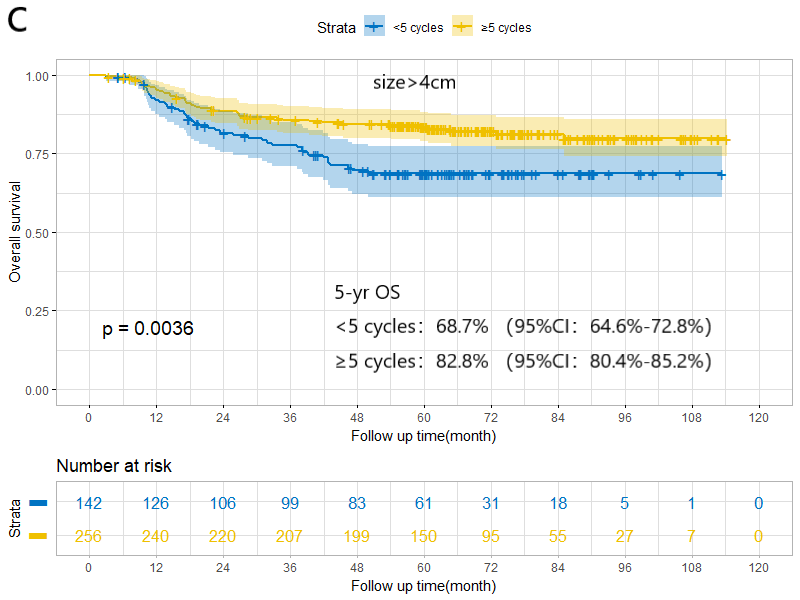

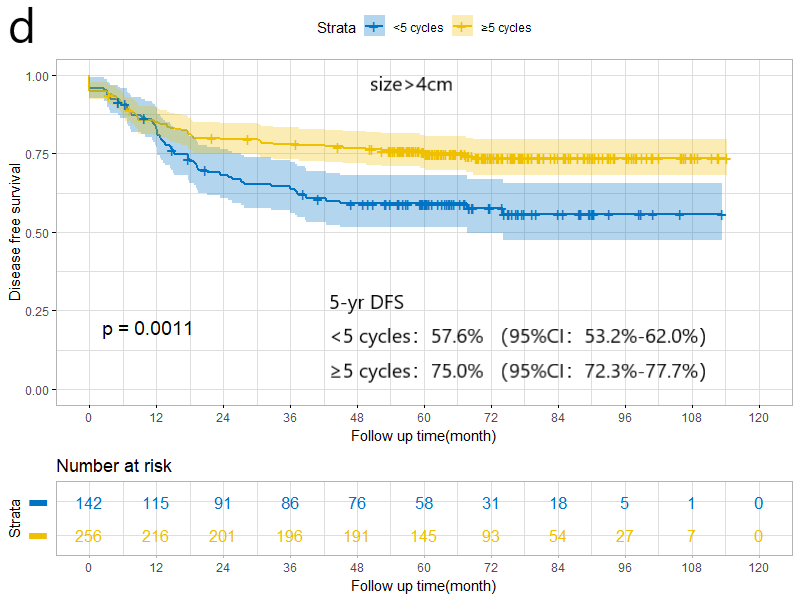


**Figure S1.** The comparison of OS between < 5 cycles and ≥ 5 cycles group in tumor size ≤ 4cm (a) and tumor size > 4cm (c); The comparison of DFS between < 5 cycles and ≥ 5 cycles group in tumor size ≤ 4cm(b) and tumor size > 4cm (d). OS, Overall survival; DFS, Disease free survival; HR: Hazard ratio; CI: Confidential interval.
